# Supplementary material for: Performance of commercial dengue NS1 ELISA and molecular analysis of NS1 gene of dengue viruses obtained during surveillance in Indonesia
Source: BMC Infect Dis. 2013 Dec 29;13:611. doi: 10.1186/1471-2334-13-611 (PMC3905968; doi:10.1186/1471-2334-13-611)

A

epitopes  
all Indonesian DENV-4  
D1/ID/SUB-026A  
all Indonesian DENV-3  
D2/ID/MDN-M004  
all Indonesian DENV-2

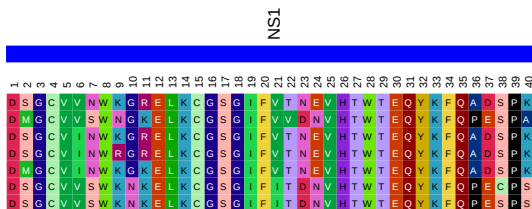

B

epitope  
all Indonesian DENV-2  
D1/ID/SUB-048A  
all Indonesian DENV-1  
D2/ID/SUB-0011, all Indonesian DENV-3 and DENV-4

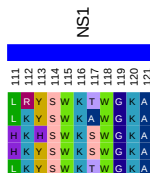

C

epitopes  
D2/ID/JKT-J002  
all Indonesian DENV-3  
D4/ID/(SUB-0007, MDN-M010)  
D1/ID/(DPS-B001, SUB-026A, SUB-032A, SMG-SE003)  
D3/ID/SUB-0023  
D3/ID/SUB-083A  
D3/ID/SUB-124A  
D3/ID/KND-K013  
D4/ID/(SUB-0029, SUB-0032)  
all Indonesian DENV-1  
all Indonesian DENV-2

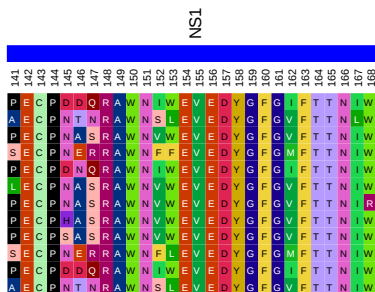

D

epitopes  
D1/ID/SUB-048A  
all Indonesian DENV-4  
D1/ID/SUB-117A  
all Indonesian DENV-2  
D1/ID/DPS-B001  
D1/ID/SUB-141A  
all Indonesian DENV-1  
D1/ID/SUB-120A  
D1/ID/SMG-SE003  
D1/ID/(SUB-0031, SUB-049A)  
D1/ID/SUB-032A  
all Indonesian DENV-3  
D1/ID/DPS-B018

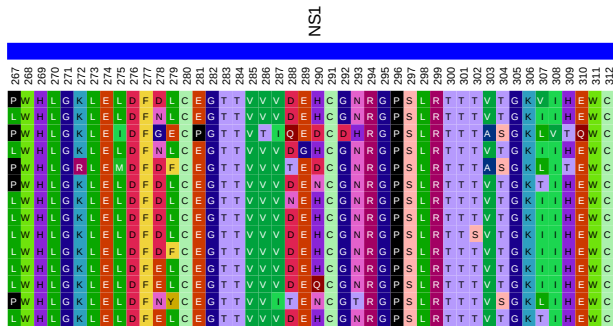

Supplement: Additional file 2: Figure S1 — Multiple sequence alignment of NS1 genes of 48 Indonesian dengue virus isolates on proposed common epitope regions. (A) Region 1 according to Masrinoul et al.[36], (B) common epitope region according to Falconar et al. and Young et al.[34,35], (C) region 2 and (D) region 3 according to Masrinoul et al.[36]. [file 1471-2334-13-611-S2.pdf]
